# Supplementary material for: TLE3 is not a predictive biomarker for taxane sensitivity in the NCIC CTG MA.21 clinical trial
Source: PubMed Central journal article supplement — Br J Cancer. 2015 Aug 18;113(5):722–8. doi: 10.1038/bjc.2015.271 (PMC4559832; doi:10.1038/bjc.2015.271), 2015-08-18
Supplement: bjc2015271x3.pdf [file bjc2015271x3.pdf]

## Supplemental Figure 2

### Comparison of Image Analysis and Visual TLE3 Scores

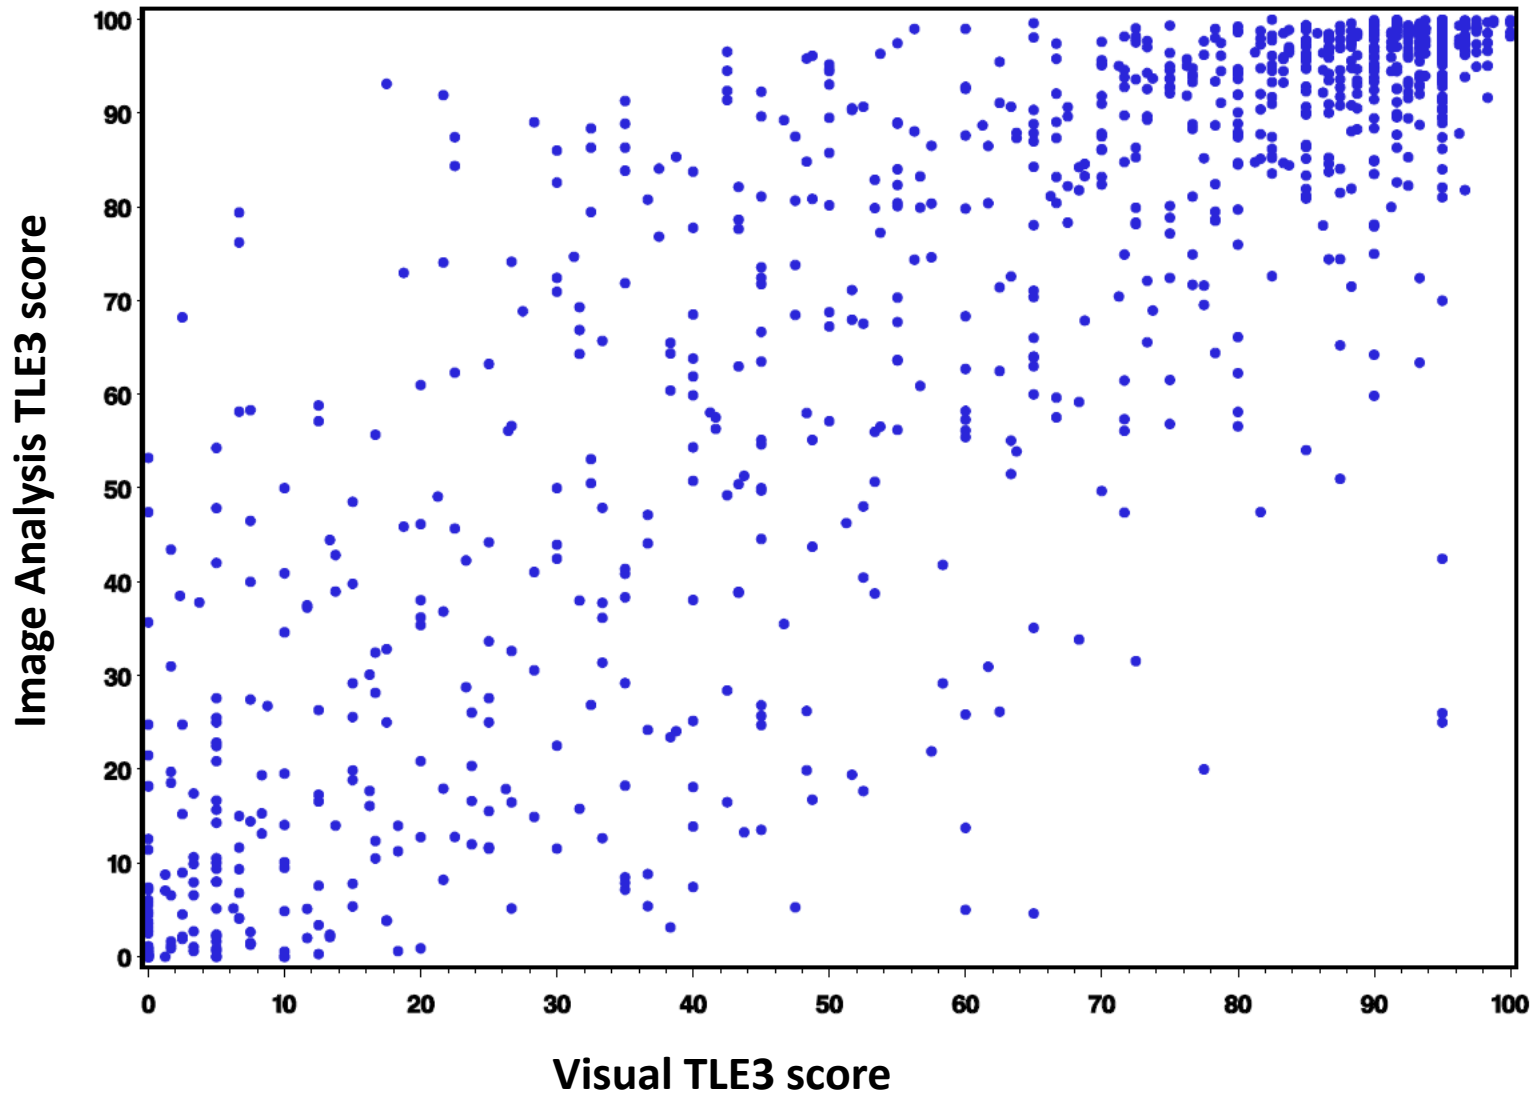

Pearson correlation = 0.85, Spearman correlation = 0.83
