# Supplementary material for: TLE3 is not a predictive biomarker for taxane sensitivity in the NCIC CTG MA.21 clinical trial
Source: PubMed Central journal article supplement — Br J Cancer. 2015 Aug 18;113(5):722–8. doi: 10.1038/bjc.2015.271 (PMC4559832; doi:10.1038/bjc.2015.271), 2015-08-18
Supplement: bjc2015271x8.pdf [file bjc2015271x8.pdf]

Supplementary Table 1: Check for imbalance in TLE3 assessment status by treatment and stratification factors.

| Variable             | Category           | All patients<br>(n=2104) | TLE3        | Non-TLE3    | P value <sup>1</sup> |
|----------------------|--------------------|--------------------------|-------------|-------------|----------------------|
| Visual IHC           |                    |                          |             |             |                      |
| Treatment            | EC/T               | 701                      | 317 (45.2%) | 384 (54.8%) | 0.116                |
|                      | CEF                | 701                      | 340 (48.5%) | 361 (51.5%) |                      |
|                      | AC/T               | 702                      | 302 (43.0%) | 400 (57%)   |                      |
| Surgery              | Total Mastectomy   | 1031                     | 463 (44.9%) | 568 (55.1%) | 0.544                |
|                      | Partial Mastectomy | 1073                     | 496 (46.2%) | 577 (53.8%) |                      |
| Nodes                | >10                | 139                      | 61 (43.9%)  | 78 (56.1%)  | 0.089                |
|                      | 4-10               | 458                      | 203 (44.3%) | 255 (55.7%) |                      |
|                      | 1-3                | 917                      | 400 (43.6%) | 517 (56.4%) |                      |
|                      | 0                  | 590                      | 295 (50.0%) | 295 (50.0%) |                      |
| ER status            | Positive           | 1240                     | 566 (45.6%) | 674 (54.4%) | 0.943                |
|                      | Negative           | 864                      | 393 (45.5%) | 471 (54.5%) |                      |
| ARIOL Image analysis |                    |                          |             |             |                      |
| Treatment            | EC/T               | 701                      | 345 (49.2%) | 356 (50.8%) | 0.076                |
|                      | CEF                | 701                      | 366 (52.2%) | 335 (47.8%) |                      |
|                      | AC/T               | 702                      | 324 (46.2%) | 378 (53.8%) |                      |
| Surgery              | Total Mastectomy   | 1031                     | 498 (48.3%) | 533 (51.7%) | 0.424                |
|                      | Partial Mastectomy | 1073                     | 537 (50.0%) | 536 (50.0%) |                      |
| Nodes                | >10                | 139                      | 64 (46.0%)  | 75 (54.0%)  | 0.115                |
|                      | 4-10               | 458                      | 219 (47.8%) | 239 (52.2%) |                      |
|                      | 1-3                | 917                      | 437 (47.7%) | 480 (52.3%) |                      |
|                      | 0                  | 590                      | 315 (53.4%) | 275 (46.6%) |                      |
| ER status            | Positive           | 1240                     | 602 (48.5%) | 638 (51.5%) | 0.479                |
|                      | Negative           | 864                      | 433 (50.1%) | 431 (49.9%) |                      |

<sup>1</sup>P-value based on exact Fisher test.
