# Supplementary figures and images for: TLE3 is not a predictive biomarker for taxane sensitivity in the NCIC CTG MA.21 clinical trial
Source: PubMed Central journal article supplement — Br J Cancer. 2015 Aug 18;113(5):722–8. doi: 10.1038/bjc.2015.271 (PMC4559832; doi:10.1038/bjc.2015.271), 2015-08-18

Supplemental Figure 1A

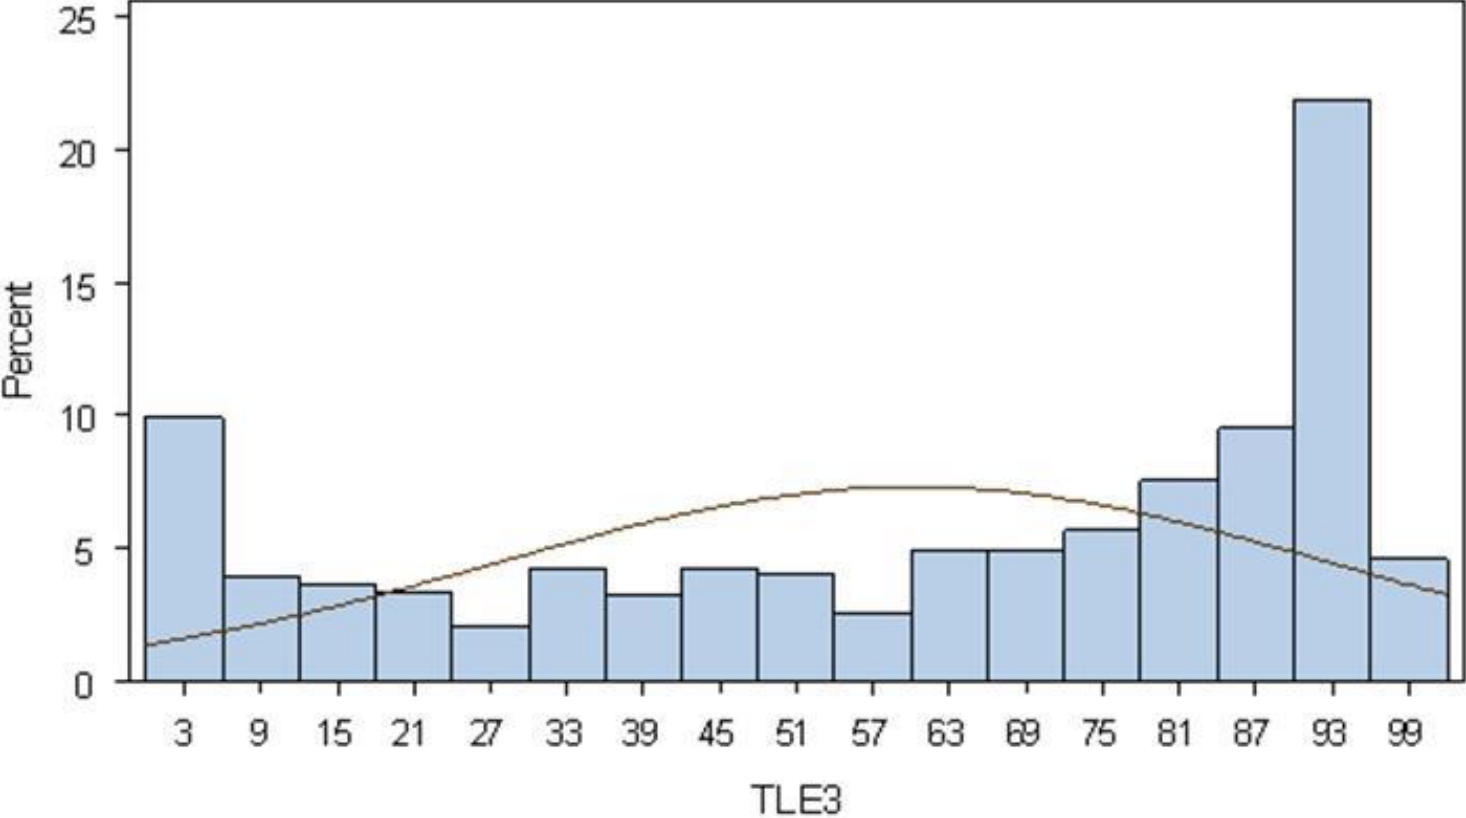

Supplement: bjc2015271x1.pdf [file bjc2015271x1.pdf]

Supplemental Figure 1B

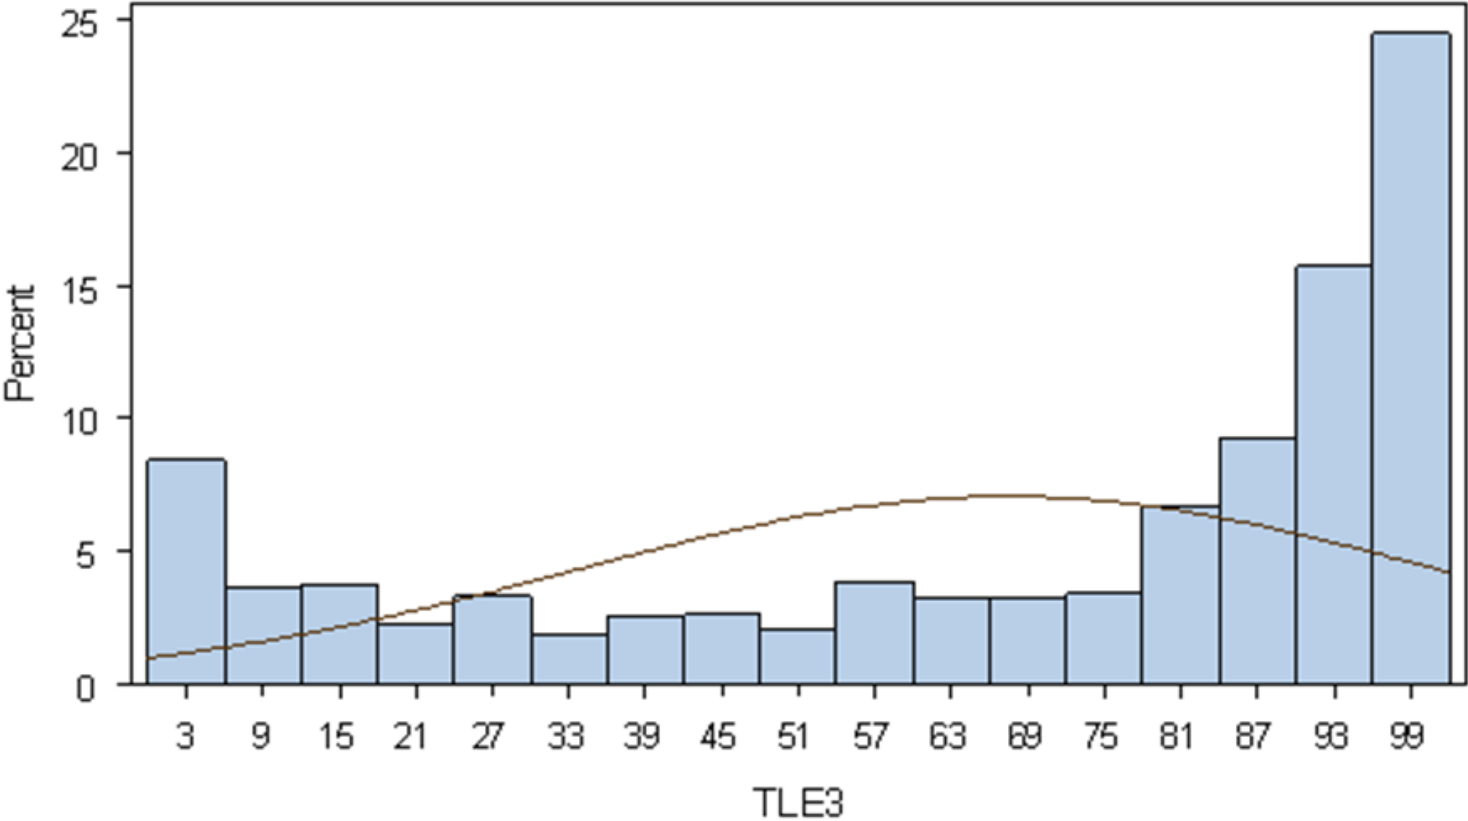

Supplement: bjc2015271x2.pdf [file bjc2015271x2.pdf]

Supplemental Figure 3A

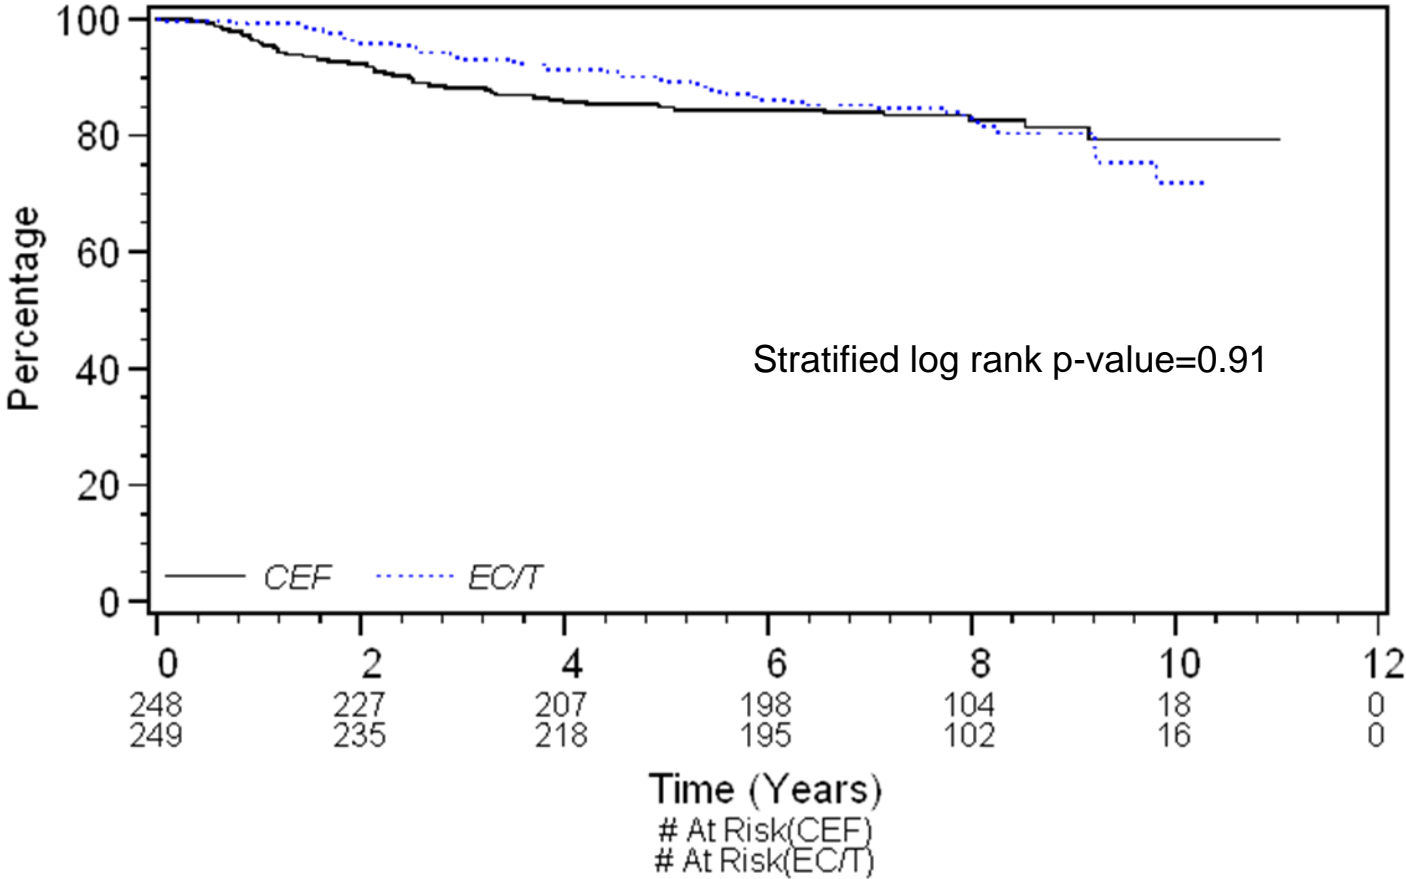

Supplement: bjc2015271x4.pdf [file bjc2015271x4.pdf]

Supplemental Figure 3B

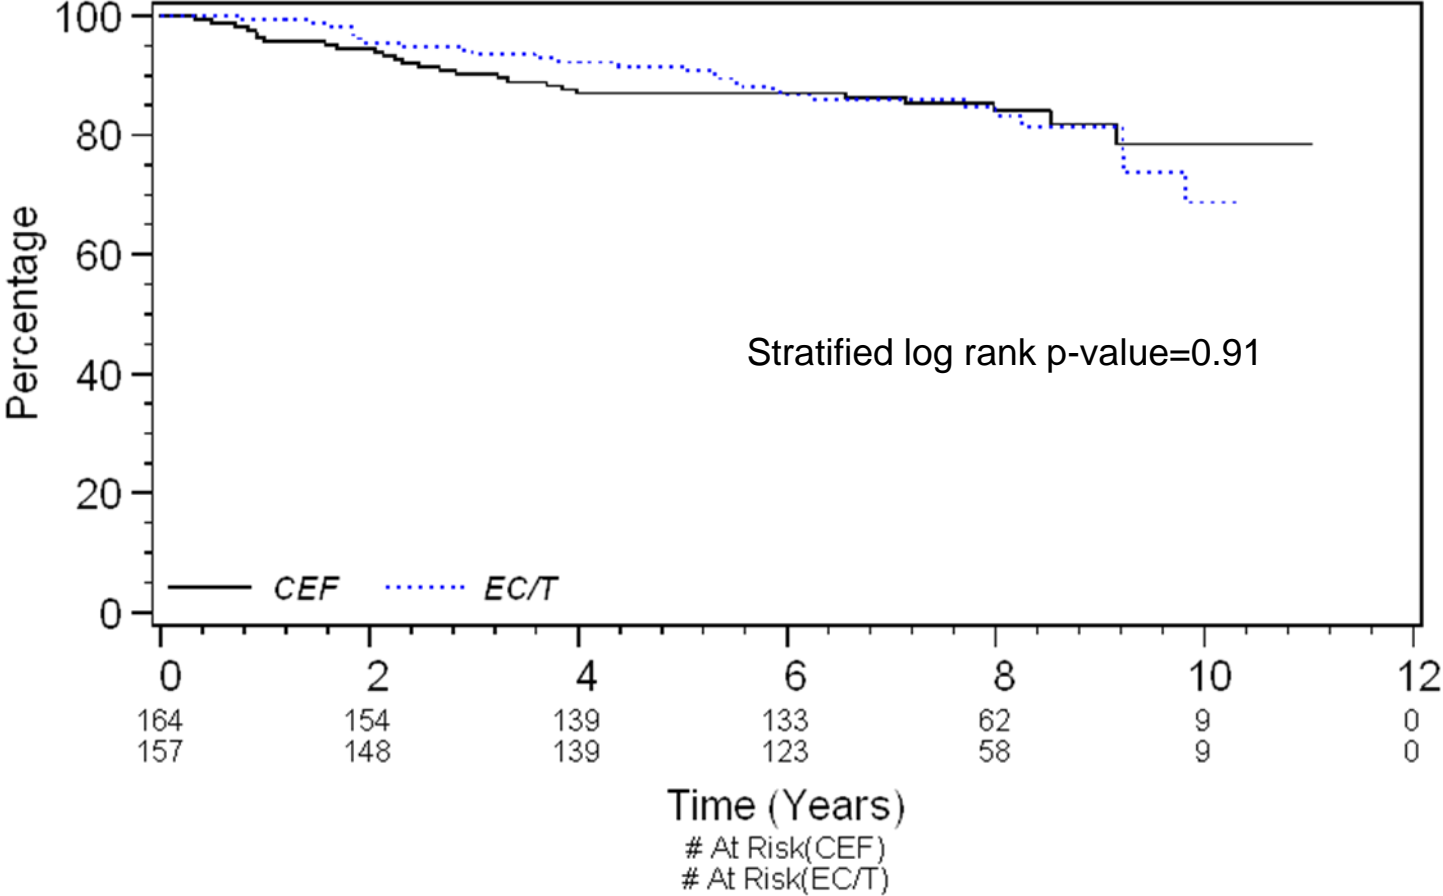

Supplement: bjc2015271x5.pdf [file bjc2015271x5.pdf]

Supplemental Figure 4A

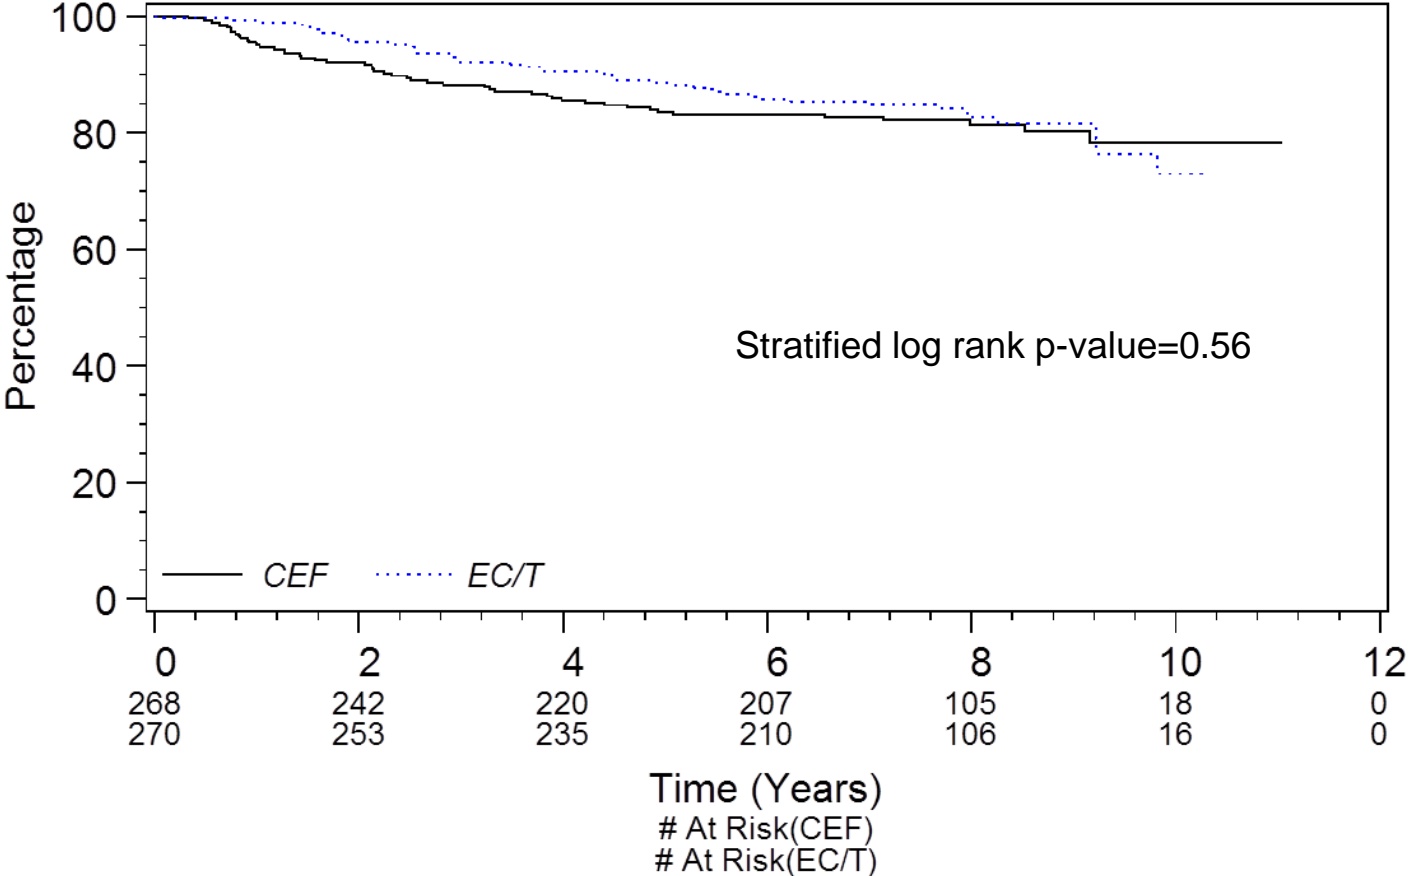

Supplement: bjc2015271x6.pdf [file bjc2015271x6.pdf]

Supplemental Figure 4B

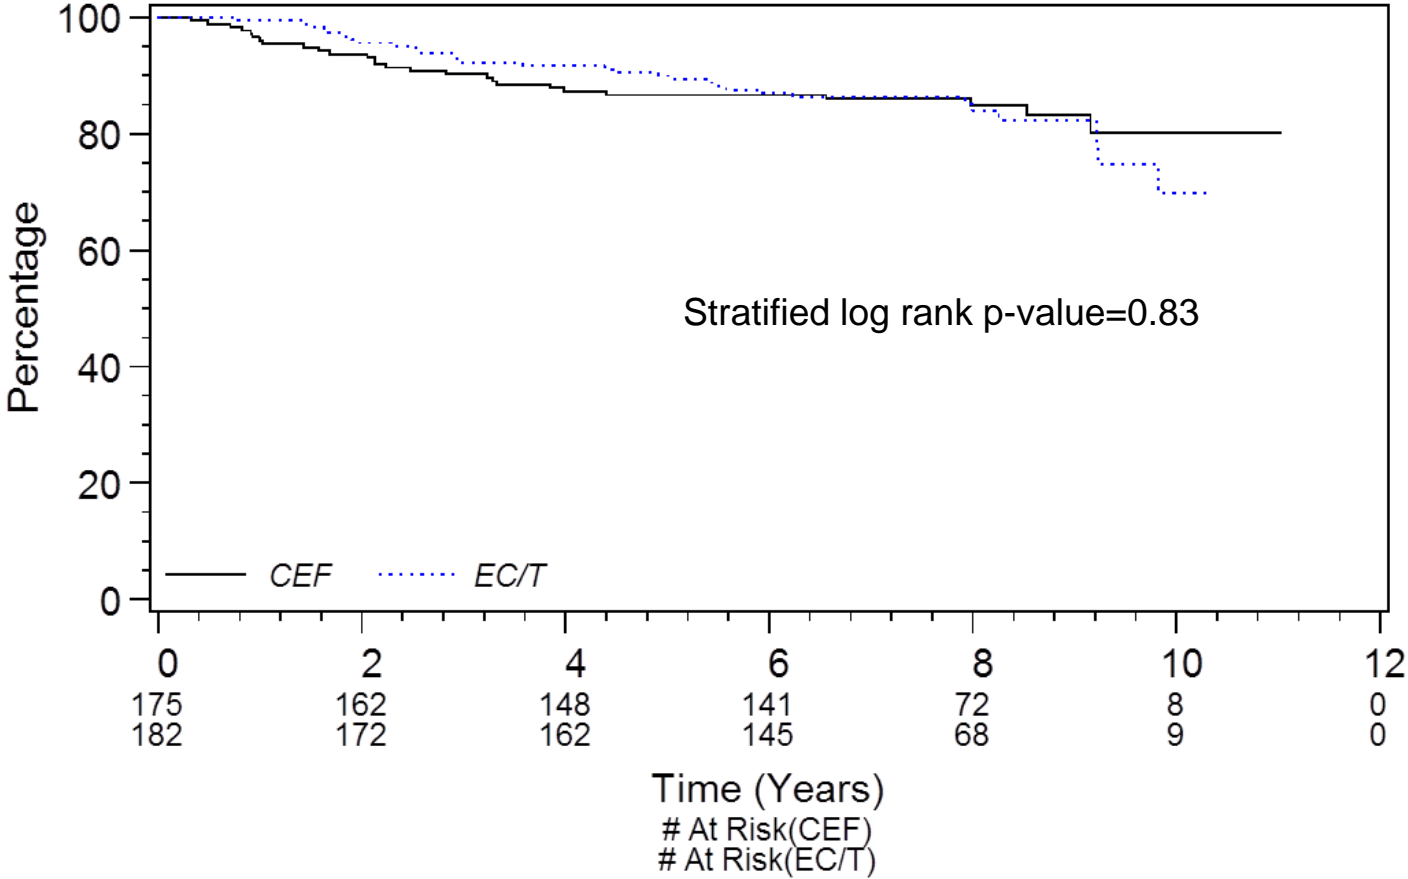

Supplement: bjc2015271x7.pdf [file bjc2015271x7.pdf]
